# Supplementary material for: Mixed matrix membranes based on fluorescent coordination polymers for the detection of Cr2O72− in water
Source: Royal Society of Chemistry journal article supplement (doi:10.1039/d4ce00182f), 2024-01-01
Supplement: d4ce00182f1.pdf [file d4ce00182f1.pdf]

## Supplementary Information

### Mixed matrix membranes based on fluorescent coordination polymers for detecting Cr<sub>2</sub>O<sub>7</sub><sup>2-</sup> in water

Yu-Kang Teng,<sup>a</sup> Qian Wu,<sup>a</sup> Yao Sun,<sup>a</sup> Chen Wang,<sup>a</sup> Rui Zhang,<sup>b\*</sup> Zhen-Zhong Lu<sup>a\*</sup>

#### Table of Contents:

|                                                                                            |      |
|--------------------------------------------------------------------------------------------|------|
| Further descriptions of crystal structures.....                                            | 2    |
| PXRD patters for <b>m-1</b> , <b>m-2</b> and <b>m-3</b> .....                              | 3    |
| The FT-IR spectra <b>m-1</b> , <b>m-2</b> and <b>m-3</b> .....                             | 3    |
| Fluorescent emission spectra of <b>m-1</b> , <b>m-2</b> and <b>m-3</b> .....               | 3    |
| Detecting Cr <sub>2</sub> O <sub>7</sub> <sup>2-</sup> by <b>m-2</b> and <b>m-3</b> .....  | 4    |
| Quenching efficiency of <b>m-1</b> , <b>m-2</b> and <b>m-3</b> in different pH values..... | 5    |
| Time-resolved fluorescence decay curves of <b>m-1</b> , <b>m-2</b> and <b>m-3</b> .....    | 6    |
| The TG profile of <b>1</b> , <b>2</b> and <b>3</b> .....                                   | 6    |
| The UV-vis absorption spectra of Cr <sub>2</sub> O <sub>7</sub> <sup>2-</sup> .....        | 6    |
| SEM images of <b>m-1</b> , <b>m-2</b> and <b>m-3</b> .....                                 | 6    |
| Crystal data of <b>1</b> , <b>2</b> and <b>3</b> .....                                     | 7    |
| Performance Cr <sub>2</sub> O <sub>7</sub> <sup>2-</sup> detection by fluorescent CPs..... | 8    |
| The bond lengths and angles for <b>1</b> , <b>2</b> and <b>3</b> .....                     | 9    |
| References.....                                                                            | 9-10 |

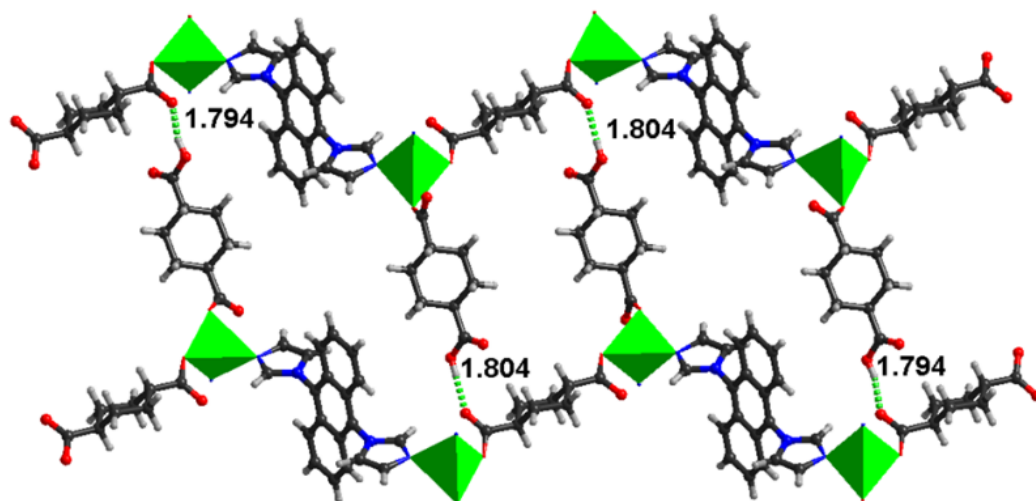

Figure S1. The O-H...O hydrogen bonds formed between adjacent layers in **1**.

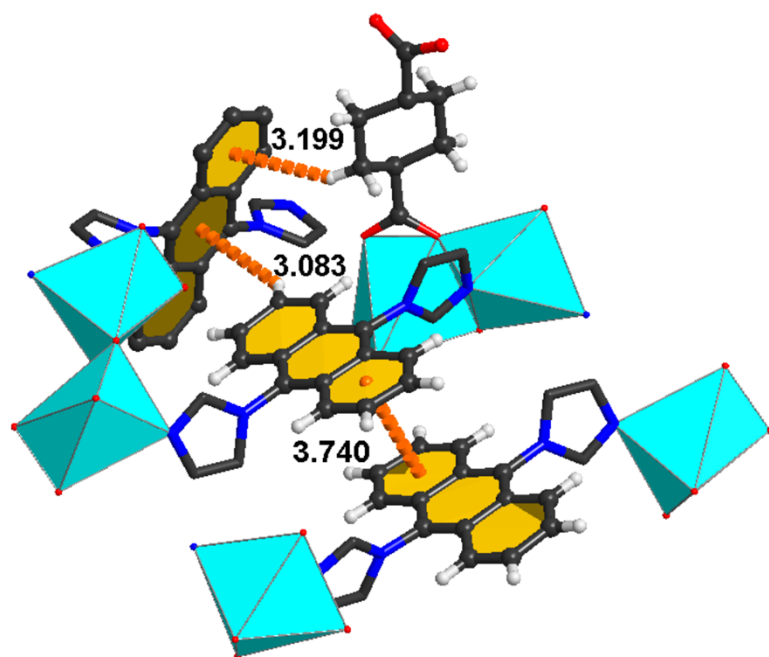

Figure S2. The  $\pi$ - $\pi$  interactions between the anthranene groups and C-H... $\pi$  interactions between *dia* and *cda* ligands in **3**.

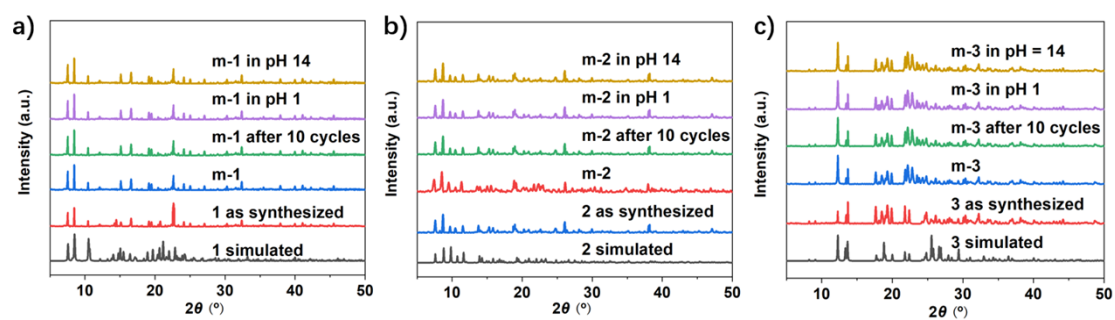

Figure S3. a) Powder XRD of **1**, **m-1** and **m-1** in aqueous solutions at pH 1, 14 for 24 hours and after 10 cycles detecting tests. b) Powder XRD of **2**, **m-2** and **m-2** in aqueous solutions at pH 1 or 14 for 24 hours and after 10 cycles detecting tests. c) Powder XRD of **3**, **m-3** and **m-3** in aqueous solutions at pH 1 or 14 for 24 hours and after 10 cycles detecting tests.

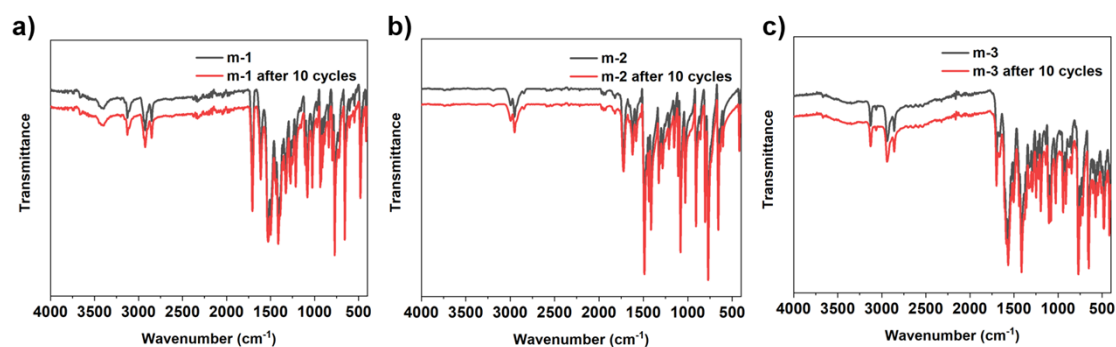

Figure S4. The FT-IR spectra for **m-1**, **m-2** and **m-3**.

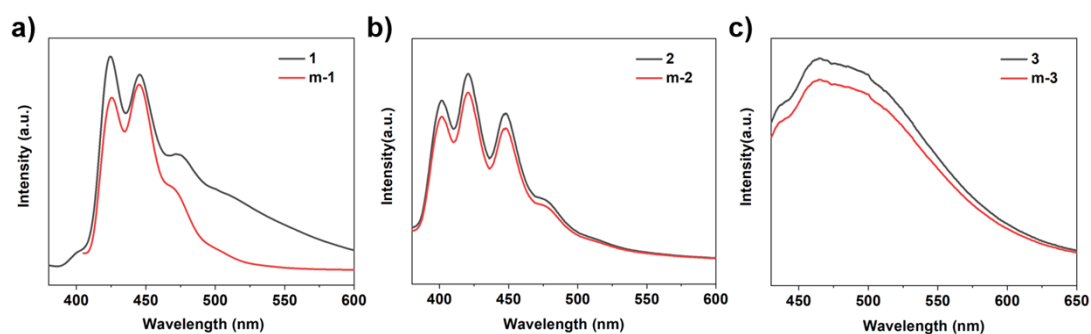

Figure S5. The emission spectra of **1-3** and **m-1**, **m-2** and **m-3** (excited at 365 nm).

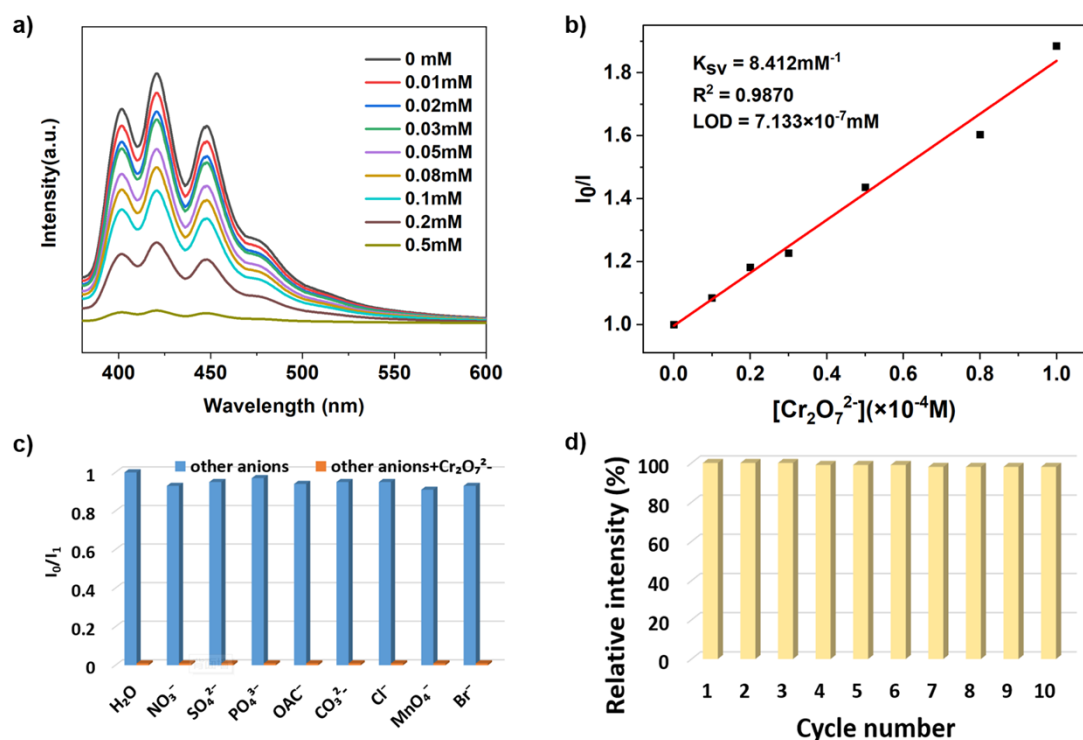

Figure S6. a) Fluorescence quenching of **m-2** towards different concentrations of  $\text{Cr}_2\text{O}_7^{2-}$  solution ( $0 - 1.0 \times 10^{-4} \text{ mol}\cdot\text{L}^{-1}$ ,  $\lambda_{\text{ex}} = 350 \text{ nm}$ ). b) Stern-Volmer plot of  $I_0/I_1$  vs. concentration of  $\text{Cr}_2\text{O}_7^{2-}$  solution for **m-2**. c) Relative fluorescence intensity of **m-2** dispersed in aqueous solutions of interfering anions (blue) and subsequent addition of  $\text{Cr}_2\text{O}_7^{2-}$  (orange). d) The variations of relative fluorescence intensity of **m-2** for detecting  $\text{Cr}_2\text{O}_7^{2-}$  under 10 cycles.

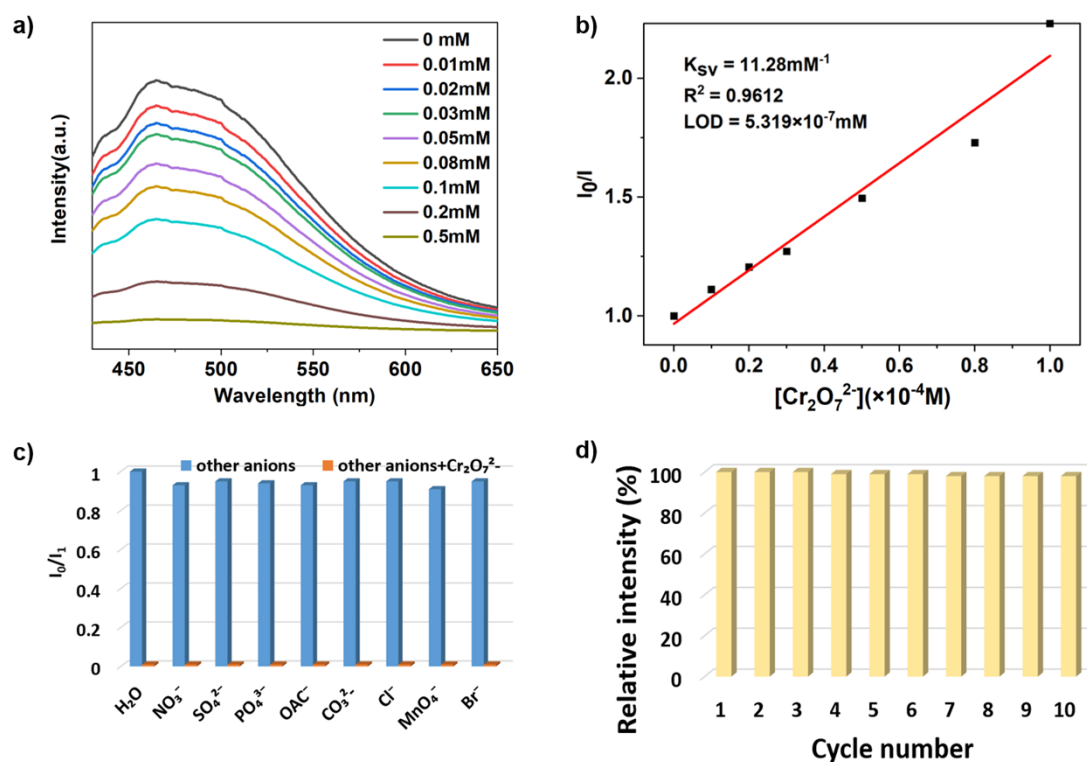

Figure S7. a) Fluorescence quenching of **m-3** towards different concentrations of  $\text{Cr}_2\text{O}_7^{2-}$  solution ( $0 - 1.0 \times 10^{-4} \text{ mol}\cdot\text{L}^{-1}$ ,  $\lambda_{\text{ex}} = 350 \text{ nm}$ ). b) Stern-Volmer plot of  $I_0/I_1$  vs. concentration of  $\text{Cr}_2\text{O}_7^{2-}$  solution for **m-3**. c) Relative fluorescence intensity of **m-3** dispersed in aqueous solutions of interfering anions (blue) and subsequent addition of  $\text{Cr}_2\text{O}_7^{2-}$  (orange). d) The variations of relative fluorescence intensity of **m-3** for detecting  $\text{Cr}_2\text{O}_7^{2-}$  under 10 cycles.

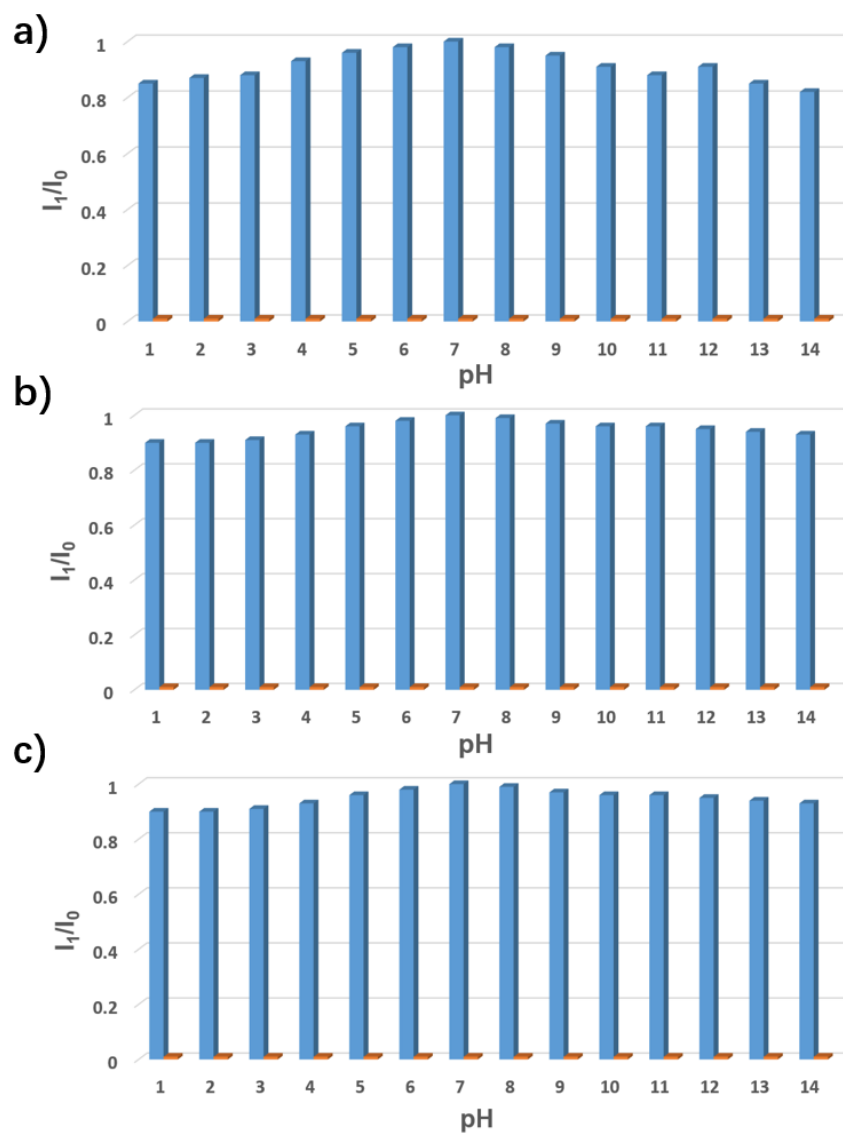

Figure S8. Relative fluorescence intensity of **m-1** (a), **m-2** (b) and **m-3** (c) in different pH aqueous solutions (blue) and subsequent addition of  $\text{Cr}_2\text{O}_7^{2-}$  ( $1 \times 10^{-3} \text{ mol}\cdot\text{L}^{-1}$ , red).

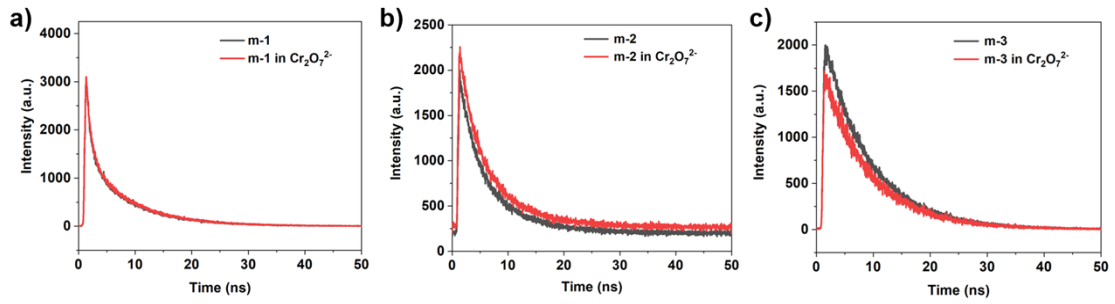

Figure S9. Time-resolved fluorescence decay curves of **m-1**, (a) and **m-2**, (b) and **m-3**, (c) before and after the addition of  $\text{Cr}_2\text{O}_7^{2-}$ .

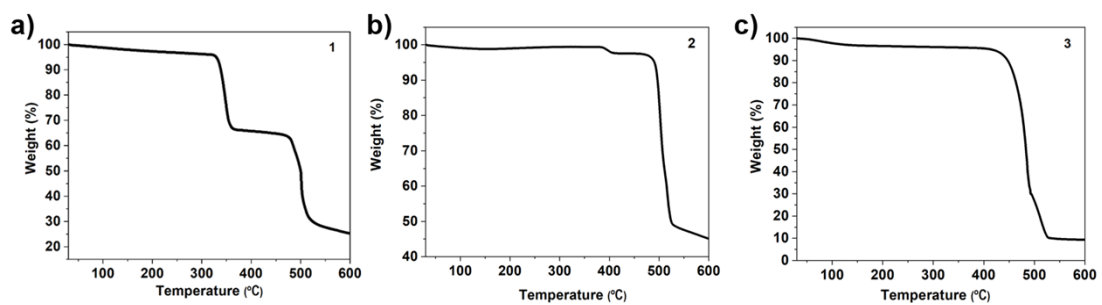

Figure S10. TG profile of **1**, **2** and **3**.

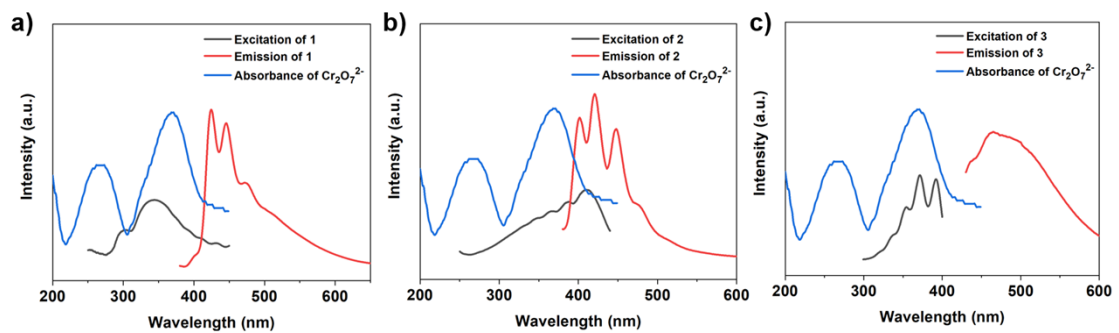

Figure S11. The excitation and emission spectra of **1**, **2** and **3**, and UV-Vis absorption spectra of  $\text{Cr}_2\text{O}_7^{2-}$  solution.

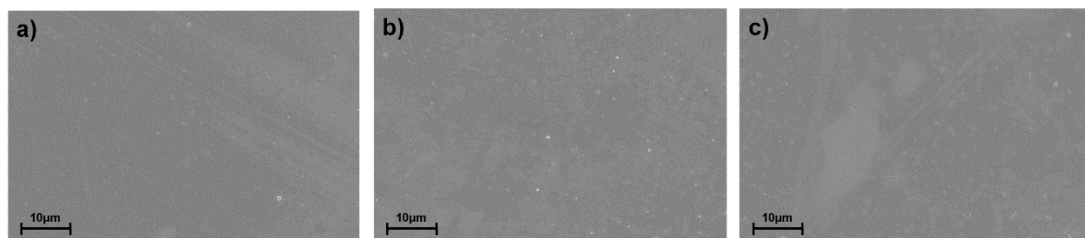

Figure S12. The SEM images for **m-1**, **m-2** and **m-3**.

**Table S1.** Crystal data and structure refinement details for **1**, **2** and **3**.

|                                                          | <b>1</b>                                                        | <b>2</b>                                                                      | <b>3</b>                                                                      |
|----------------------------------------------------------|-----------------------------------------------------------------|-------------------------------------------------------------------------------|-------------------------------------------------------------------------------|
| Formula                                                  | C <sub>56</sub> H <sub>49</sub> ZnN <sub>8</sub> O <sub>8</sub> | C <sub>56</sub> H <sub>48</sub> Zn <sub>2</sub> N <sub>8</sub> O <sub>8</sub> | C <sub>46</sub> H <sub>45</sub> Cd <sub>2</sub> N <sub>6</sub> O <sub>8</sub> |
| Molecular weight                                         | 1027.43                                                         | 1091.81                                                                       | 1034.71                                                                       |
| Crystal system                                           | Triclinic                                                       | Triclinic                                                                     | Monoclinic                                                                    |
| Space group                                              | <i>P</i> -1                                                     | <i>P</i> -1                                                                   | <i>P</i> 2 <sub>1</sub> / <i>c</i>                                            |
| a (Å)                                                    | 12.3978(6)                                                      | 11.9919(7)                                                                    | 13.1661(2)                                                                    |
| b(Å)                                                     | 13.1970(7)                                                      | 16.8356(10)                                                                   | 20.0691(4)                                                                    |
| c(Å)                                                     | 21.5304(11)                                                     | 17.1730(9)                                                                    | 17.0366(3)                                                                    |
| α (°)                                                    | 76.780(2)                                                       | 64.117(3)                                                                     | 90                                                                            |
| β (°)                                                    | 75.297(2)                                                       | 79.161(3)                                                                     | 104.9600(10)                                                                  |
| γ (°)                                                    | 62.998(2)                                                       | 77.410(4)                                                                     | 90                                                                            |
| V (Å <sup>3</sup> )                                      | 3009.5(3)                                                       | 3027.2(3)                                                                     | 4349.03(13)                                                                   |
| Z                                                        | 2                                                               | 2                                                                             | 4                                                                             |
| F(000)                                                   | 1332                                                            | 1128                                                                          | 2156                                                                          |
| μ (mm <sup>-1</sup> )                                    | 0.710                                                           | 0.710                                                                         | 1.541                                                                         |
| D <sub>c</sub> (g/cm <sup>3</sup> )                      | 1.415                                                           | 1.198                                                                         | 1.629                                                                         |
| R(int)                                                   | 0.0867                                                          | 0.1667                                                                        | 0.0346                                                                        |
| GOF on F <sup>2</sup>                                    | 1.049                                                           | 0.990                                                                         | 1.044                                                                         |
| R <sub>1</sub> <sup>a</sup> [ <i>I</i> >2σ( <i>I</i> )]  | 0.0688                                                          | 0.0904                                                                        | 0.0312                                                                        |
| wR <sub>2</sub> <sup>b</sup> [ <i>I</i> >2σ( <i>I</i> )] | 0.1784                                                          | 0.1967                                                                        | 0.1025                                                                        |

**Table S2.** Performance of fluorescent CPs for Cr<sub>2</sub>O<sub>7</sub><sup>2-</sup> detection.

| CPs                                                                                                                           | LOD(<br>μM) | Linear<br>range<br>(mM) | K <sub>sv</sub> (M <sup>-1</sup> ) | Response<br>time | ref              |
|-------------------------------------------------------------------------------------------------------------------------------|-------------|-------------------------|------------------------------------|------------------|------------------|
| {[Zn <sub>2</sub> (5N <sub>3</sub> -IPA) <sub>2</sub> (4,4'-azp) <sub>2</sub> ](H <sub>2</sub> O) <sub>8</sub> ] <sub>n</sub> | 0.004       | -                       | 5.87 × 10 <sup>4</sup>             | -                | 1                |
| Eu-mtb MMM (70 wt%)                                                                                                           | 0.005       |                         |                                    | seconds          | 2                |
| Zn(NIPH) <sub>2</sub> (HPF) <sub>2</sub>                                                                                      | 0.02        | -                       | 1.3 × 10 <sup>4</sup>              | -                | 3                |
| RhB-Zn-MOF                                                                                                                    | 0.02        |                         | 1.57 × 10 <sup>4</sup>             |                  | 4                |
| Zn(tpbpc) <sub>2</sub>                                                                                                        | 0.047       | 0-250                   | 1.65 × 10 <sup>5</sup>             | 10 min           | 5                |
| SQDs@UiO-66-NH <sub>2</sub>                                                                                                   | 0.16        | 0-200                   | 2.9 × 10 <sup>4</sup>              | 10 s             | 6                |
| [Cd <sub>1.5</sub> (L) <sub>2</sub> (bpy)(NO <sub>3</sub> ) <sub>2</sub> ·2DMF·2H <sub>2</sub> O                              | 0.422       | -                       | 5.42 × 10 <sup>4</sup>             | -                | 7                |
| <b>3</b>                                                                                                                      | <b>0.5</b>  | <b>0-100</b>            | <b>1.28 × 10<sup>4</sup></b>       | <b>Seconds</b>   | <b>This work</b> |
| [Al(OH)(IPA-CHO)]·0.5H <sub>2</sub> O·0.4DMF                                                                                  | 0.69        | -                       | 1.43 × 10 <sup>4</sup>             | seconds          | 8                |
| <b>2</b>                                                                                                                      | <b>0.7</b>  | <b>0-100</b>            | <b>8.41 × 10<sup>3</sup></b>       | <b>Seconds</b>   | <b>This work</b> |
| <b>1</b>                                                                                                                      | <b>0.8</b>  | <b>0-100</b>            | <b>6.79 × 10<sup>3</sup></b>       | <b>Seconds</b>   | <b>This work</b> |
| MOF-Cel-Nap                                                                                                                   | 1.07        |                         |                                    | seconds          | 9                |
| [Zn(LBIX)(HEA)] <sub>n</sub>                                                                                                  | 1.53        | 10–60                   | 1.15 × 10 <sup>4</sup>             |                  | 10               |
| NU-100                                                                                                                        | 1.8         | -                       | 1.34 × 10 <sup>4</sup>             | -                | 11               |
| [Ag(btX) <sub>0.5</sub> (DCTP) <sub>0.5</sub> ] <sub>n</sub>                                                                  | 2.04        | 5-50                    | 1.92 × 10 <sup>4</sup>             | -                | 12               |
| [Zn <sub>2</sub> (TPOM)(NDC) <sub>2</sub> ·3.5H <sub>2</sub> O                                                                | 2.35        | 0-120                   | 9.31 × 10 <sup>3</sup>             | seconds          | 13               |
| [Cd(IPA)(3-PN)] <sub>n</sub>                                                                                                  | 2.52        | 0-400                   | 2.91 × 10 <sup>3</sup>             | -                | 14               |
| {[Zn <sub>2</sub> (TPOM)(NH <sub>2</sub> -BDC) <sub>2</sub> ·4H <sub>2</sub> O] <sub>n</sub>                                  | 3.9         | -                       | 7,59 × 10 <sup>3</sup>             | -                | 15               |
| [Zn <sub>3</sub> (OH) <sub>2</sub> (btca) <sub>2</sub> ·2DMF]·H <sub>2</sub> O                                                | 9.31        | 5-30                    | 2.0 × 10 <sup>4</sup>              |                  | 16               |
| [Zn(IPA)(3-PN)] <sub>n</sub>                                                                                                  | 12.02       | -                       | 1.37 × 10 <sup>3</sup>             | -                | 13               |



**Table S3** Selected bond lengths (Å) and angles (°) for **1**, **2** and **3**.

| <b>1</b> |           |           |           |           |           |
|----------|-----------|-----------|-----------|-----------|-----------|
| Zn1-O1   | 1.946(3)  | O1-Zn1-O2 | 105.92(1) |           |           |
| Zn1-O2   | 1.944(4)  | O1-Zn1-N1 | 105.52(1) |           |           |
| Zn1-N1   | 2.036(4)  | O2-Zn1-N2 | 100.00(1) |           |           |
| Zn1-N2   | 1.998(3)  | N1-Zn1-N2 | 104.26(1) |           |           |
| <b>2</b> |           |           |           |           |           |
| Zn1-O1   | 1.917(6)  | O1-Zn1-O2 | 100.5(2)  |           |           |
| Zn1-O2   | 1.9413(5) | O1-Zn1-N1 | 113.6(3)  |           |           |
| Zn1-N1   | 2.0218(6) | O2-Zn1-N2 | 114.6(3)  |           |           |
| Zn1-N2   | 1.9963(6) | N1-Zn1-N2 | 99.5(3)   |           |           |
| <b>3</b> |           |           |           |           |           |
| Cd1-O1   | 2.3440(2) | O1-Cd1-O2 | 56.57(8)  | O3-Cd1-O4 | 54.55(9)  |
| Cd1-O2   | 2.2912(2) | O2-Cd1-O4 | 116.29(1) | O3-Cd1-N1 | 103.83(1) |
| Cd1-O3   | 2.3085(3) | O4-Cd1-N1 | 92.78(1)  | O6-Cd1-O1 | 118.38(8) |
| Cd1-O4   | 2.3388(2) | O1-Cd1-N1 | 100.89(8) | O6-Cd1-O2 | 84.80(8)  |
| Cd1-O6   | 2.3190(2) | O3-Cd1-O1 | 104.67(9) | O6-Cd1-O4 | 79.15(8)  |
| Cd1-N1   | 2.2383(2) | O3-Cd1-O2 | 103.87(1) | O6-Cd1-N1 | 88.30(9)  |
| Cd2-O4   | 2.6008(3) | O4-Cd2-O6 | 75.58(8)  | N3-Cd2-N2 | 114.91(1) |
| Cd2-O6   | 2.2170(9) | O4-Cd2-O7 | 87.97(8)  | N3-Cd2-O6 | 99.78(9)  |
| Cd2-O7   | 2.3310(1) | O4-Cd2-O8 | 77.94(1)  | O7-Cd2-O8 | 56.42(7)  |
| Cd2-O8   | 2.3503(2) | O4-Cd2-N2 | 81.10(1)  | O6-Cd2-O8 | 97.22(8)  |
| Cd2-N2   | 2.2277(2) | N3-Cd2-O7 | 89.73(1)  | N2-Cd2-O6 | 105.48(9) |
| Cd2-N3   | 2.2893(3) | N3-Cd2-O8 | 87.57(9)  | O7-Cd2-N2 | 94.14(8)  |

## References

- [1] S. Mukherjee, S. Ganguly, D. Samanta and D. Das, *ACS Sustain Chem. Eng.*, 2020, **8**, 1195.
- [2] S. Zhang, H. Zheng, Y. Yang, G. Qian, and Y. Cui, *Front Chem.*, 2022, **10**, 852402.
- [3] M. A. Akram, J. W. Ye, G. Y. Wang, L. Shi, Z. Liu, H. Lu, S. Q. Zhang and G. L. Ning, *Polyhedron.*, 2020, **185**, 114604.
- [4] J. M. Shah, S. Sharif, O. Sahin, M. Shahbaz, W. Azeem and S. Ahmad, *Spectrochim Acta A.*, 2024, **310**, 123899.
- [5] J. N. Xiao, J. J. Liu, X. C. Gao, G. F. Ji, D. B. Wang and Z. L. Liu, *Sens. Actuators B Chem.*, 2018, **269**, 164.
- [6] Y. Q. Zhang, J. X. Liu, X. H. Wu, W. Q. Tao and Z. Li, *Anal. Chim. Acta.*, 2020, **1131**, 68.
- [7] M. Singh, S. Senthilkumar, S. Rajput and S. Neogi, *Inorg. Chem.*, 2020, **59**, 3012–3025.
- [8] S. Nandi, A. Mondal, H. Reinsch and S. Biswas, *Inorg. Chim. Acta.*, 2019, **497**, 119078.
- [9] E.Y. Kayhan, M. B. Yildirim, A. Koce and M. Yilmaz, *Int J Biol Macromol.*, 2023, **240**,

124426.

- [10] Y. Wang, N. Gao and J. Hu, *ChemistrySelect.*, 2023, **8**, 549.
- [11] Z. J. Lin, H. Q. Zheng, H. Y. Zheng, L. P. Lin, Q. Xin and R. Cao, *Inorg. Chem.*, 2017, **56**, 14178.
- [12] H. N. Chang, L. W. Liu, Z. C. Hao and G. H. Cui, *J. Mol. Struct.*, 2018, **1155**, 496.
- [13] R. Lv, H. Li, J. Su, X. Fu, B. Y. Yang, W. Gu and X. Liu, *Inorg. Chem.*, 2017, **56**, 12348.
- [14] B. Parmar, Y. Rachuri, K. K. Bisht, R. Laiya and E. Suresh, *Inorg. Chem.*, 2017, **56**, 2627.
- [15] R. Lv, J. Y. Wang, Y. P. Zhang, H. Li, L. Y. Yang, S. Y. Liao, W. Gu and X. Liu, *J. Mater. Chem. A.*, 2016, **4**, 15494.
- [16] H. Liu, Z. Ma, F. Meng, Y. Ding, Y. Fu, M. Zheng and J. Yang, *Polyhedron.*, 2022, **222**, 115930.
